# Supplementary material for: Modulation of inflammatory responses by fractalkine signaling in microglia
Source: PubMed Central journal article supplement (PMC8139449; doi:10.1371/journal.pone.0252118), 2021-05-21

**S1 Fig**

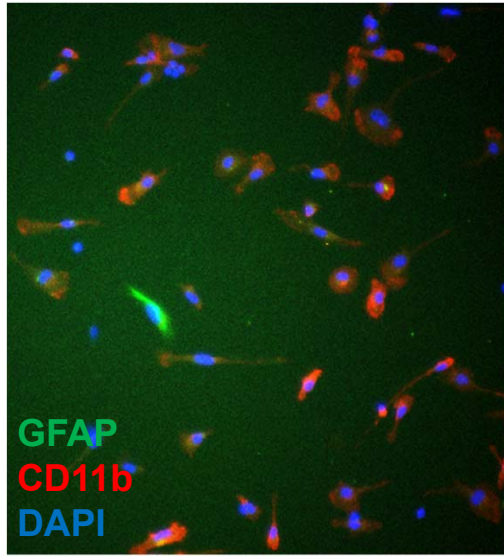

Supplement: pone.0252118.s001.pdf [file pone.0252118.s001.pdf]
