# Supplementary material for: Modulation of inflammatory responses by fractalkine signaling in microglia
Source: PubMed Central journal article supplement (PMC8139449; doi:10.1371/journal.pone.0252118), 2021-05-21
Supplement: pone.0252118.s004.pdf [file pone.0252118.s004.pdf]

**S1 Table**

| Gene           | Forward/Reverse | Sequence               | Size (bp) |
|----------------|-----------------|------------------------|-----------|
| GAPDH          | Forward         | TGCATCCTGCACCACCAACTGC | 203       |
|                | Reverse         | ACAGCCTTGGCAGCACCAGTGG |           |
| $\beta$ -Actin | Forward         | AGCCATGTACGTAGCCATCC   | 228       |
|                | Reverse         | CTCTCAGCTGTGGTGGTGAA   |           |
| iNOS           | Forward         | GGCAAACCCAAGGTCTACGTT  | 154       |
|                | Reverse         | TCGCTCAAGTCCAGCTTGGT   |           |
| CX3CR1         | Forward         | CAGCATCGACCGGTACCTT    | 65        |
|                | Reverse         | GCTGCACTGTCCGGTTGTT    |           |
